# Supplementary material for: Applicability of Diagnostic Criteria and Prevalence of Familial Dysbetalipoproteinemia in Russia
Source: Preprints.org preprint supplement (doi:10.20944/preprints202306.0140.v1), 2023-06-02
Supplement: Supplementary file 2 [file Supplementary Materials_S2.docx]

| **Characteristics** | **ESSE-Ivanovo sample**  **(n = 1656)** |
| --- | --- |
| Men, n (%) | 617 (37.3%) |
| Age, years | 49 [39; 57] |
| BMI, kg/m2 | 28.0 [24.7; 31.8]  n = 1652 |
| Presence of diabetes, n (%) | 82 (5.0%) |
| Presence of arterial hypertension, n (%) | 1230 (74.3%) |
| CHD, n (%) | 73 (4.4%) |
| Statins, n (%) | 93 (5.6%)  n = 1648 |
| TC, mmol/L | 5.46 [4.72; 6.28]  n = 1652 |
| TG, mmol/L | 1.23 [0.87; 1.82]  n = 1652 |
| LDL-C, mmol/L | 3.20 [2.41; 4.01]  n = 1652 |
| HDL-C, mmol/L | 1.38 [1.18; 1.62]  n = 1652 |

**Supplementary Table S1**. Characteristics of ESSE-Ivanovo sample.

BMI—body mass index; CHD—coronary heart disease; HDL-C—high density lipoprotein cholesterol; LDL-C—low density lipoprotein cholesterol; TG—triglycerides; TC—total cholesterol. Data are presented as percentages or median [Q1; Q3].

.
